# Supplementary material for: Comparative genomics and genotype-phenotype associations in Bifidobacterium breve
Source: PubMed Central journal article supplement (PMC6045613; doi:10.1038/s41598-018-28919-4), 2018-07-13
Supplement: 41598_2018_28919_MOESM1_ESM.pdf [file 41598_2018_28919_MOESM1_ESM.pdf]

**Comparative genomics and genotype-phenotype associations in  
*Bifidobacterium breve*.**

**Francesca Bottacini<sup>1</sup>, Ruth Morrissey<sup>1</sup>, Maria Esteban Torres<sup>1</sup>, Kieran James<sup>1,2</sup>, Justin van Breen<sup>1</sup>, Evgenia Dikareva<sup>1</sup>, Muireann Egan<sup>1</sup>, Jolanda Lambert<sup>3</sup>, Kees van Limpt<sup>3</sup>, Jan Knol<sup>3,4</sup>, Mary O'Connell Motherway<sup>1</sup> and Douwe van Sinderen<sup>1,2\*</sup>.**

<sup>1</sup> APC Microbiome Ireland and <sup>2</sup> School of Microbiology, University College Cork, Western Road,  
Cork, Ireland

<sup>3</sup> Danone Nutricia Research, Utrecht, The Netherlands

<sup>4</sup> Laboratory of Microbiology, Wageningen University, Wageningen, The Netherlands

\* Corresponding author.

Corresponding author email address: [d.vansinderen@ucc.ie](mailto:d.vansinderen@ucc.ie)

## **Supplementary Material.**

### **Figure S1. Gene clusters returning positive hit in GTM analysis.**

Locus maps of the seven GTM positive hits with surrounding regions on the chromosome. From these maps one can discern how growth on substrates corresponds to the insertion of one or multiple genes within the *B. breve* chromosome.

### **Figure S2. EPS production in *B. breve*.**

Locus map representing the EPS region in *B. breve* across the 20 *B. breve* representatives ordered by decreasing locus size. In red and green are indicated those representatives showing an “EPS negative” and “EPS positive” phenotype in experimental assay.

**Table S1. List of *Bifidobacterium breve* strains used for GTM analysis.**

|    | <b>Organism/Name</b>                     | <b>Origin (Reference)</b>                              | <b>Accession number</b> | <b>Size (Mb)</b> | <b>ORF number</b> |
|----|------------------------------------------|--------------------------------------------------------|-------------------------|------------------|-------------------|
| 1  | <i>Bifidobacterium breve</i> UCC2003     | Infant isolate (Breast Fed) <sup>39</sup>              | CP000303                | 2422680          | 1854              |
| 2  | <i>Bifidobacterium breve</i> NRBB01      | Infant isolate <sup>40</sup>                           | CP021384                | 2269404          | 1902              |
| 3  | <i>Bifidobacterium breve</i> NRBB57      | BbC50, infant <sup>40</sup>                            | CP021389                | 2510381          | 2125              |
| 4  | <i>Bifidobacterium breve</i> NRBB04      | Infant isolate, ATCC 15698 <sup>40</sup>               | CP021386                | 2324647          | 1874              |
| 5  | <i>Bifidobacterium breve</i> NRBB09      | Infant isolate (Breast Fed) Subject 3 <sup>40</sup>    | CP021387                | 2265557          | 1881              |
| 6  | <i>Bifidobacterium breve</i> NRBB11      | Infant isolate (Breast Fed) Subject 6 <sup>40</sup>    | CP021388                | 2377562          | 1916              |
| 7  | <i>Bifidobacterium breve</i> NRBB18      | Infant Isolate Subject 1 (Formula Fed) <sup>40</sup>   | CP023193                | 2289686          | 1874              |
| 8  | <i>Bifidobacterium breve</i> NRBB50      | Infant isolate (Breast Fed) Subject 903 <sup>40</sup>  | CP021391                | 2409058          | 2021              |
| 9  | <i>Bifidobacterium breve</i> NRBB51      | Infant isolate (Breast Fed) <sup>40</sup>              | CP021392                | 2402272          | 1960              |
| 10 | <i>Bifidobacterium breve</i> NRBB52      | Infant isolate (Breast Fed), subject 903 <sup>40</sup> | CP021393                | 2379672          | 1989              |
| 11 | <i>Bifidobacterium breve</i> NRBB56      | Infant isolate, NIZO 658 <sup>40</sup>                 | CP021394                | 2425122          | 1985              |
| 12 | <i>Bifidobacterium breve</i> CNCM I-4321 | Child isolate CNCM I-4321 <sup>40</sup>                | CP021559                | 2464852          | 2082              |
| 13 | <i>Bifidobacterium breve</i> DRBB26      | Child isolate <sup>40</sup>                            | CP021390                | 2396387          | 1978              |
| 14 | <i>Bifidobacterium breve</i> DRBB27      | Infant Isolate <sup>40</sup>                           | CP021552                | 2435083          | 2079              |
| 15 | <i>Bifidobacterium breve</i> DRBB28      | Infant Isolate <sup>40</sup>                           | CP021553                | 2462170          | 2096              |
| 16 | <i>Bifidobacterium breve</i> 017W4-39    | Infant Isolate <sup>40</sup>                           | CP021554                | 2301422          | 1923              |
| 17 | <i>Bifidobacterium breve</i> 082W4-8     | Infant isolate (Breast Fed) <sup>40</sup>              | CP021555                | 2286339          | 1885              |
| 18 | <i>Bifidobacterium breve</i> 180W8-3     | Infant isolate <sup>40</sup>                           | CP021557                | 2273173          | 1891              |
| 19 | <i>Bifidobacterium breve</i> 139W4-23    | Infant isolate <sup>40</sup>                           | CP021556                | 2411276          | 2013              |
| 20 | <i>Bifidobacterium breve</i> 215W4-47a   | Infant isolate <sup>40</sup>                           | CP021558                | 2589602          | 2219              |

**Table S2. Bifidobacterial strains used for computing the *B. breve* pan-genome.**

|    | <b>Organism/Name</b>                         | <b>Size<br/>(Mb)</b> | <b>GC%</b> | <b>Accession number/WGS</b> | <b>Status</b> | <b>Scaffolds</b> |
|----|----------------------------------------------|----------------------|------------|-----------------------------|---------------|------------------|
| 1  | <i>Bifidobacterium breve</i> UCC2003         | 2.42268              | 58.7       | CP000303.1                  | COMPLETE      | 1                |
| 2  | <i>Bifidobacterium breve</i> ACS-071-V-Sch8b | 2.32749              | 58.7       | CP002743.1                  | COMPLETE      | 1                |
| 3  | <i>Bifidobacterium breve</i> 12L             | 2.24462              | 58.9       | CP006711.1                  | COMPLETE      | 1                |
| 4  | <i>Bifidobacterium breve</i> JCM 7017        | 2.28892              | 58.7       | CP006712.1                  | COMPLETE      | 1                |
| 5  | <i>Bifidobacterium breve</i> JCM 7019        | 2.35901              | 58.6       | CP006713.1                  | COMPLETE      | 1                |
| 6  | <i>Bifidobacterium breve</i> NCFB 2258       | 2.3159               | 58.7       | CP006714.1                  | COMPLETE      | 1                |
| 7  | <i>Bifidobacterium breve</i> 689b            | 2.33171              | 58.7       | CP006715.1                  | COMPLETE      | 1                |
| 8  | <i>Bifidobacterium breve</i> S27             | 2.29446              | 58.7       | CP006716.1                  | COMPLETE      | 1                |
| 9  | <i>Bifidobacterium breve</i> BR3             | 2.42601              | 59.11      | CP010413.1                  | COMPLETE      | 2                |
| 10 | <i>Bifidobacterium breve</i> DSM20213        | 2.26941              | 58.9       | AP012324.1                  | COMPLETE      | 1                |
| 11 | <i>Bifidobacterium breve</i> NRBB01          | 2269404              | 58.8       | CP021384                    | COMPLETE      | 1                |
| 12 | <i>Bifidobacterium breve</i> NRBB02          | 2289884              | 58.5       | CP021385                    | COMPLETE      | 1                |
| 13 | <i>Bifidobacterium breve</i> NRBB04          | 2324647              | 58.7       | CP021386                    | COMPLETE      | 1                |
| 14 | <i>Bifidobacterium breve</i> NRBB08          | 2289759              | 58.5       | CP023192                    | COMPLETE      | 1                |
| 15 | <i>Bifidobacterium breve</i> NRBB09          | 2265557              | 58.6       | CP021387                    | COMPLETE      | 1                |
| 16 | <i>Bifidobacterium breve</i> NRBB11          | 2377562              | 58.7       | CP021388                    | COMPLETE      | 1                |
| 17 | <i>Bifidobacterium breve</i> NRBB18          | 2289686              | 58.5       | CP023193                    | COMPLETE      | 1                |
| 18 | <i>Bifidobacterium breve</i> NRBB19          | 2289726              | 58.5       | CP023194                    | COMPLETE      | 1                |
| 19 | <i>Bifidobacterium breve</i> NRBB20          | 2289892              | 58.5       | CP023195                    | COMPLETE      | 1                |
| 20 | <i>Bifidobacterium breve</i> NRBB27          | 2289838              | 58.5       | CP023196                    | COMPLETE      | 1                |
| 21 | <i>Bifidobacterium breve</i> NRBB49          | 2289791              | 58.5       | CP023197                    | COMPLETE      | 1                |
| 22 | <i>Bifidobacterium breve</i> NRBB50          | 2409058              | 58.8       | CP021391                    | COMPLETE      | 1                |
| 23 | <i>Bifidobacterium breve</i> NRBB51          | 2402272              | 59         | CP021392                    | COMPLETE      | 1                |
| 24 | <i>Bifidobacterium breve</i> NRBB52          | 2379672              | 58.8       | CP021393                    | COMPLETE      | 1                |
| 25 | <i>Bifidobacterium breve</i> NRBB56          | 2425122              | 58.9       | CP021394                    | COMPLETE      | 1                |
| 26 | <i>Bifidobacterium breve</i> NRBB57          | 2510381              | 59.3       | CP021389                    | COMPLETE      | 1                |
| 27 | <i>Bifidobacterium breve</i> CNCM I-4321     | 2464852              | 58.9       | CP021559                    | COMPLETE      | 1                |
| 28 | <i>Bifidobacterium breve</i> DRBB26          | 2396387              | 58.5       | CP021390                    | COMPLETE      | 1                |

|    |                                        |         |      |          |          |     |
|----|----------------------------------------|---------|------|----------|----------|-----|
| 29 | <i>Bifidobacterium breve</i> DRBB27    | 2435083 | 58.8 | CP021552 | COMPLETE | 1   |
| 30 | <i>Bifidobacterium breve</i> DRBB28    | 2462170 | 58.9 | CP021553 | COMPLETE | 1   |
| 31 | <i>Bifidobacterium breve</i> DRBB29    | 2435086 | 58.9 | CP023198 | COMPLETE | 1   |
| 32 | <i>Bifidobacterium breve</i> DRBB30    | 2471118 | 58.9 | CP023199 | COMPLETE | 1   |
| 33 | <i>Bifidobacterium breve</i> 017W4-39  | 2301422 | 58.7 | CP021554 | COMPLETE | 1   |
| 34 | <i>Bifidobacterium breve</i> 082W4-8   | 2286339 | 58.8 | CP021555 | COMPLETE | 1   |
| 35 | <i>Bifidobacterium breve</i> 180W8-3   | 2273173 | 58.8 | CP021557 | COMPLETE | 1   |
| 36 | <i>Bifidobacterium breve</i> 139W4-23  | 2411276 | 58.6 | CP021556 | COMPLETE | 1   |
| 37 | <i>Bifidobacterium breve</i> 215W4-47a | 2589602 | 59.2 | CP021558 | COMPLETE | 1   |
| 38 | <i>Bifidobacterium breve</i> DSM20213  | 2.33139 | 58.5 | ACCG02   | DRAFT    | 103 |
| 39 | <i>Bifidobacterium breve</i> HPH0326   | 2.50431 | 59.1 | ATCB01   | DRAFT    | 4   |
| 40 | <i>Bifidobacterium breve</i> JCP7499   | 2.36972 | 58.6 | AWSX01   | DRAFT    | 68  |
| 41 | <i>Bifidobacterium breve</i> GED8481   | 2.35844 | 58.6 | LRPP01   | DRAFT    | 29  |
| 42 | <i>Bifidobacterium breve</i> DPC 6330  | 2.38623 | 58.6 | AFXX01   | DRAFT    | 47  |
| 43 | <i>Bifidobacterium breve</i> CECT 7263 | 2.3144  | 58.9 | AFVV01   | DRAFT    | 34  |
| 44 | <i>Bifidobacterium breve</i> 2L        | 2.24072 | 58.9 | AWUG01   | DRAFT    | 6   |
| 45 | <i>Bifidobacterium breve</i> LMG 13208 | 2.26378 | 58.9 | JGYR01   | DRAFT    | 31  |
| 46 | <i>Bifidobacterium breve</i> DSM20213  | 2.25713 | 58.9 | JDUD01   | DRAFT    | 29  |
| 47 | <i>Bifidobacterium breve</i> BBRI4     | 2.42672 | 58.7 | LFII01   | DRAFT    | 28  |
| 48 | <i>Bifidobacterium breve</i> MCC 0476  | 2.23381 | 58.6 | AVQB01   | DRAFT    | 15  |
| 49 | <i>Bifidobacterium breve</i> MCC 1114  | 2.48728 | 59   | AVQC01   | DRAFT    | 33  |
| 50 | <i>Bifidobacterium breve</i> MCC 1128  | 2.48022 | 58.9 | AVQD01   | DRAFT    | 25  |
| 51 | <i>Bifidobacterium breve</i> MCC 0121  | 2.43634 | 58.9 | AVQA01   | DRAFT    | 27  |
| 52 | <i>Bifidobacterium breve</i> MCC 1604  | 2.20639 | 58.7 | AVQE01   | DRAFT    | 15  |
| 53 | <i>Bifidobacterium breve</i> BR-06     | 2.6608  | 59.2 | BCXL01   | DRAFT    | 101 |
| 54 | <i>Bifidobacterium breve</i> BR-07     | 2.24948 | 58.7 | BCXM01   | DRAFT    | 27  |
| 55 | <i>Bifidobacterium breve</i> BR-10     | 2.34992 | 58.8 | BCXN01   | DRAFT    | 60  |
| 56 | <i>Bifidobacterium breve</i> BR-14     | 2.52987 | 59.2 | BCXO01   | DRAFT    | 57  |
| 57 | <i>Bifidobacterium breve</i> BR-15     | 2.3738  | 58.7 | BCXP01   | DRAFT    | 27  |
| 58 | <i>Bifidobacterium breve</i> BR-19     | 2.32499 | 58.6 | BCXQ01   | DRAFT    | 15  |

|    |                                       |         |      |        |       |     |
|----|---------------------------------------|---------|------|--------|-------|-----|
| 59 | <i>Bifidobacterium breve</i> BR-20    | 2.33547 | 58.8 | BCXR01 | DRAFT | 52  |
| 60 | <i>Bifidobacterium breve</i> BR-21    | 2.61462 | 59.2 | BCXS01 | DRAFT | 66  |
| 61 | <i>Bifidobacterium breve</i> BR-A29   | 2.38763 | 58.8 | BCXT01 | DRAFT | 62  |
| 62 | <i>Bifidobacterium breve</i> BR-C29   | 2.28766 | 58.9 | BCXU01 | DRAFT | 41  |
| 63 | <i>Bifidobacterium breve</i> BR-H29   | 2.47084 | 59.2 | BCXV01 | DRAFT | 39  |
| 64 | <i>Bifidobacterium breve</i> BR-I29   | 2.24992 | 58.7 | BCXW01 | DRAFT | 39  |
| 65 | <i>Bifidobacterium breve</i> BR-L29   | 2.34466 | 59   | BCXX01 | DRAFT | 44  |
| 66 | <i>Bifidobacterium breve</i> RP2      | 2.26049 | 58.7 | FNFW01 | DRAFT | 25  |
| 67 | <i>Bifidobacterium breve</i> MCC 1605 | 2.32401 | 59   | AWFV01 | DRAFT | 37  |
| 68 | <i>Bifidobacterium breve</i> MCC 0305 | 2.28684 | 58.8 | AWFR01 | DRAFT | 22  |
| 69 | <i>Bifidobacterium breve</i> MCC 1094 | 2.32721 | 59   | AWFS01 | DRAFT | 23  |
| 70 | <i>Bifidobacterium breve</i> MCC 1340 | 2.37311 | 58.6 | AWFT01 | DRAFT | 23  |
| 71 | <i>Bifidobacterium breve</i> MCC 1454 | 2.45745 | 58.5 | AWFU01 | DRAFT | 14  |
| 72 | <i>Bifidobacterium breve</i> 31L      | 2.26565 | 58.6 | AWUF01 | DRAFT | 4   |
| 73 | <i>Bifidobacterium breve</i> JCM 1192 | 2.23281 | 58.7 | BBAO01 | DRAFT | 143 |

**Table S3. Substrates used for assessing growth capabilities in *B. breve*.**

|    | <b>Substrate</b>                         | <b>Type</b>                               | <b>Formula</b>                |
|----|------------------------------------------|-------------------------------------------|-------------------------------|
| 1  | 2'-Fucosyllactose                        | Oligosaccharide                           | $C_{18}H_{32}O_{15}$          |
| 2  | Adenosine                                | Nucleoside                                | $C_{10}H_{13}N_5O_4$          |
| 3  | Amylopectin                              | Polysaccharide (plants)                   | $C_{30}H_{52}O_{26}$          |
| 4  | Arabinose                                | Monosaccharide                            | $C_5H_{10}O_5$                |
| 5  | Arabinoxylan                             | Polysaccharide (plants)                   | $C_{40}H_{64}O_{32}$          |
| 6  | Arbutin                                  | Glycosilated hydroquinone (plants)        | $C_{12}H_{16}O_7$             |
| 7  | $\beta$ -cyclodextrin                    | Cyclic oligosaccharide (food additive)    | $C_{42}H_{70}O_{35}$          |
| 8  | Cellobiose                               | Disaccharide (plants)                     | $C_{12}H_{22}O_{11}$          |
| 9  | Cellulose                                | Polysaccharide (plants)                   | $(C_6H_{10}O_5)_n$            |
| 10 | Cyclomaltoheptaose                       | Cyclic oligosaccharide (food additive)    | $C_{42}H_{72}O_{36}$          |
| 11 | Cytidine                                 | Nucleoside (Cytosine $\beta$ -D-riboside) | $C_9H_{13}N_3O_5$             |
| 12 | D-arabitol                               | Sugar alcohol                             | $C_5H_{12}O_5$                |
| 13 | Deoxyadenosine                           | Deoxyribonucleoside                       | $C_{10}H_{13}N_5O_3$          |
| 14 | Deoxy-D-ribose                           | Monosaccharide                            | $C_5H_{10}O_4$                |
| 15 | Deoxy-L-ribose                           | Monosaccharide                            | $C_5H_{10}O_4$                |
| 16 | D-lyxose                                 | Monosaccharide                            | $C_5H_{10}O_5$                |
| 17 | D-maltitol                               | Sugar alcohol                             | $C_{12}H_{24}O_{11}$          |
| 18 | D-mandelonitrile- $\beta$ -gentiobioside | Cyanogenic glycoside (plants)             | $C_{20}H_{27}NO_{11}$         |
| 19 | Deoxycytidine                            | Deoxyribonucleoside                       | $C_9H_{13}N_3O_4$             |
| 20 | D-Salicin                                | Alcoholic $\beta$ -glucoside (plants)     | $C_{13}H_{18}O_7$             |
| 21 | D-Turanose                               | Disaccharide (plants)                     | $C_{12}H_{22}O_{11}$          |
| 22 | Esculin                                  | Coumarin glucoside (plants)               | $C_{15}H_{16}O_9$             |
| 23 | Fructooligosaccharides                   | Oligosaccharide (plants)                  | -                             |
| 24 | Fructose                                 | Monosaccharide                            | $C_6H_{12}O_6$                |
| 25 | Fucose                                   | Monosaccharide                            | $C_6H_{12}O_5$                |
| 26 | Galactan                                 | Polysaccharide (plants)                   | $C_{20}H_{36}O_{16}$          |
| 27 | Galactose                                | Monosaccharide                            | $C_6H_{12}O_6$                |
| 28 | Galacturonic acid                        | Sugar acid                                | $C_6H_{10}O_7$                |
| 29 | $\gamma$ -cyclodextrin                   | Cyclic oligosaccharide (food additive)    | $C_{48}H_{80}O_{40}$          |
| 30 | Glucan                                   | Polysaccharides                           | $(C_6H_{10}O_5)_n$            |
| 31 | Glucose                                  | Monosaccharide                            | $C_6H_{12}O_6$                |
| 32 | Glucuronic acid                          | Sugar acid                                | $C_6H_{10}O_7$                |
| 33 | Glycogen                                 | Polysaccharide                            | $(C_6H_{10}O_5)_n$            |
| 34 | Galactooligosaccharides                  | Oligosaccharide                           | -                             |
| 35 | Inosine                                  | Nucleoside                                | $C_{10}H_{12}N_4O_5$          |
| 36 | Inulin                                   | Polysaccharides (plants)                  | $C_{6n}H_{(10n+2)}O_{(5n+1)}$ |
| 37 | Lactitol                                 | Sugar alcohol                             | $C_{12}H_{24}O_{11}$          |

|    |                               |                                |                               |
|----|-------------------------------|--------------------------------|-------------------------------|
| 38 | Lactobionic acid              | Sugar acid                     | $C_{12}H_{22}O_{12}$          |
| 39 | Lactose                       | Disaccharide                   | $C_{12}H_{22}O_{11}$          |
| 40 | Lactulose                     | Disaccharide                   | $C_{12}H_{22}O_{11}$          |
| 41 | L-arabitol                    | Sugar alcohol                  | $C_5H_{12}O_5$                |
| 42 | Lacto- <i>N</i> -neotetraose  | Oligosaccharide (human milk)   | $C_{26}H_{45}NO_{21}$         |
| 43 | Maltodextrin                  | Polysaccharide (food additive) | $C_{6n}H_{(10n+2)}O_{(5n+1)}$ |
| 44 | Maltose                       | Disaccharide                   | $C_{12}H_{22}O_{11}$          |
| 45 | Mannitol                      | Sugar alcohol                  | $C_6H_{14}O_6$                |
| 46 | Mannose                       | Monosaccharide                 | $C_6H_{12}O_6$                |
| 47 | Melezitose                    | Trisaccharide (plants)         | $C_{18}H_{32}O_{16}$          |
| 48 | Melibiose                     | Disaccharide                   | $C_{12}H_{22}O_{11}$          |
| 49 | Methyl-D-galactopyranoside    | Monosaccharide                 | $C_7H_{14}O_6$                |
| 50 | Methyl-D-glucopyranoside      | Monosaccharide                 | $C_7H_{14}O_6$                |
| 51 | Mucin                         | Glycan (host derived)          | -                             |
| 52 | Myo-inositol                  | Sugar alcohol                  | $C_6H_{12}O_6$                |
| 53 | <i>N</i> -acetylgalactosamine | Amino sugar                    | $C_8H_{15}NO_6$               |
| 54 | <i>N</i> -acetylmannosamine   | Amino sugar                    | $C_8H_{15}NO_6$               |
| 55 | <i>N</i> -acetylglucosamine   | Amino sugar                    | $C_8H_{15}NO_6$               |
| 56 | Palatinose                    | Disaccharide                   | $C_{12}H_{22}O_{11}$          |
| 57 | Pectin                        | Polysaccharide (plants)        | $C_6H_{10}O_7$                |
| 58 | Pectin acidic                 | Polysaccharide (plants)        | $C_6H_{10}O_7$                |
| 59 | Psicose                       | Monosaccharide                 | $C_6H_{12}O_6$                |
| 60 | Pullulan                      | Polysaccharide                 | $(C_6H_{12}O_5)_n$            |
| 61 | Raffinose                     | Trisaccharide (plants)         | $C_{18}H_{32}O_{16}$          |
| 62 | Raftiline                     | Polysaccharides (plants)       | $C_{6n}H_{(10n+2)}O_{(5n+1)}$ |
| 63 | Rhamnose                      | Monosaccharide                 | $C_6H_{12}O_5$                |
| 64 | Ribose                        | Monosaccharide                 | $C_5H_{10}O_5$                |
| 65 | Saponin                       | Glycosides (plants)            | $C_{27}H_{42}O_3$             |
| 66 | Sialic acid                   | Glycan (host derived)          | $C_{11}H_{19}NO_9$            |
| 67 | Sorbitol                      | Sugar alcohol                  | $C_6H_{14}O_6$                |
| 68 | Sorbose                       | Monosaccharide ketose          | $C_6H_{12}O_6$                |
| 69 | Starch                        | Polysaccharide (plants)        | $(C_6H_{10}O_5)_n$            |
| 70 | Sucralose                     | Sugar chlorinate               | $C_{12}H_{19}Cl_3O_8$         |
| 71 | Sucrose                       | Disaccharide                   | $C_{12}H_{22}O_{11}$          |
| 72 | Tagatose                      | Monosaccharide                 | $C_6H_{12}O_6$                |
| 73 | Thymidine                     | Deoxynucleoside                | $C_{10}H_{14}N_2O_5$          |
| 74 | Uridine                       | Glycosilated pyrimidine analog | $C_9H_{12}N_2O_6$             |
| 75 | Xylitol                       | Sugar alcohol                  | $C_5H_{12}O_5$                |
| 76 | Xylooligosaccharides          | Oligosaccharide (plants)       | -                             |
| 77 | Xylose                        | Monosaccharide (plants)        | $C_5H_{10}O_5$                |



**Table S4. Antimicrobials used in this study.**

| <b>Antibiotic</b> | <b>Class</b>    | <b>Purpose</b>                    |
|-------------------|-----------------|-----------------------------------|
| Tetracycline      | Tetracycline    | Initial screening                 |
| Erythromycin      | Macrolide       | Initial screening/GTM assessment  |
| Streptomycin      | Aminoglycoside  | Initial screening/ GTM assessment |
| Kanamycin         | Aminoglycoside  | Initial screening/GTM assessment  |
| Neomycin          | Aminoglycoside  | Initial screening                 |
| Gentamicin        | Aminoglycoside  | Initial screening                 |
| Chloramphenicol   | Chloramphenicol | Initial screening                 |
| Amikacin          | Aminoglycoside  | GTM assessment                    |
| Tobramycin        | Aminoglycoside  | GTM assessment                    |
| Bleomycin         | Aminoglycoside  | GTM assessment                    |
| Netilmicin        | Aminoglycoside  | GTM assessment                    |

**Table S5. Oligonucleotide primers used in this study.**

| <b>Purpose</b>                                                    | <b>Primer</b> | <b>Sequence*</b>                              |
|-------------------------------------------------------------------|---------------|-----------------------------------------------|
| Cloning of Bbr_0020 gene                                          | 0020F         | cattaca <b>agctt</b> ccacaacctctgatttcgtgc    |
|                                                                   | 0020R         | ggtaat <b>ctagac</b> gtccagttcttgaggcttttag   |
| Confirmation of site-specific homologous recombination (Bbr_0020) | 0020conf      | gctgtactaccaattccctgg                         |
|                                                                   | TetWF         | tcagctgctgacatgctcatgtacggtaag                |
| Cloning of Bbr_0021 gene                                          | 0021F         | ggttaca <b>agctt</b> cgattactacgcagacatgtcc   |
|                                                                   | 0021R         | ggtaat <b>ctagaga</b> agttgcgtcacaccttgatcg   |
| Confirmation of site-specific homologous recombination (Bbr_0021) | 0021conf      | cgtctgacacatacgaacg                           |
|                                                                   | TetWF         | tcagctgctgacatgctcatgtacggtaag                |
| Cloning of NRBB51_1114 gene                                       | 1114F         | ttcgca <b>ctgcagg</b> ggcgctatttgcctg         |
|                                                                   | 1114R         | cgtcc <b>gaagctt</b> ctgtgccacgcccaac         |
| Cloning of CNCMI4321_0985-87 locus                                | 0985-87F      | tagcat <b>ctgcag</b> atggcggatgaaatgcgac      |
|                                                                   | 0985-87R      | gcatc <b>taagctt</b> agcggcgacgcatccaaatc     |
| Cloning of CNCMI4321_0985 gene                                    | 0985F         | tagcat <b>ctgcag</b> attagcttctggggtatc       |
|                                                                   | 0985R         | gcatc <b>taagctt</b> agcggcgacgcatccaaatc     |
| Cloning of CNCMI4321_0986 gene                                    | 0986F         | tagcat <b>ctgcagg</b> gtaaacccggctgcctggatagc |
|                                                                   | 0986R         | gcatc <b>taagctt</b> gacgaactccaatcactg       |
| Cloning of CNCMI4321_0987 gene                                    | 0987F         | tagcat <b>ctgcag</b> atggcggatgaaatgcgac      |
|                                                                   | 0987R         | gcatc <b>taagctt</b> cacctcaaatggttcgctg      |

\* Restriction sites indicated in bold

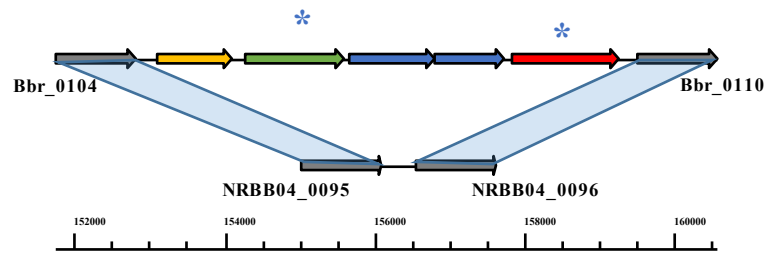

**Cellobiose utilization cluster**

Cellobiose +

Cellobiose -

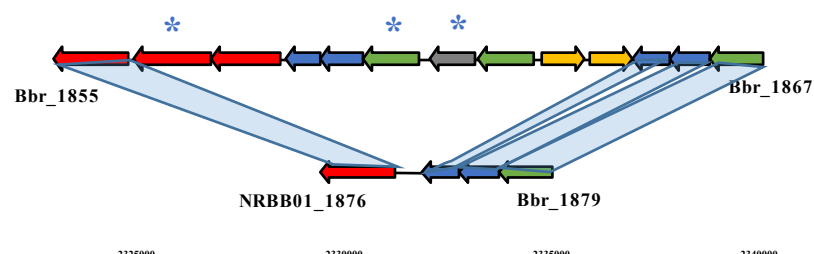

**Melezitose utilization cluster**

Melezitose+

Melezitose-

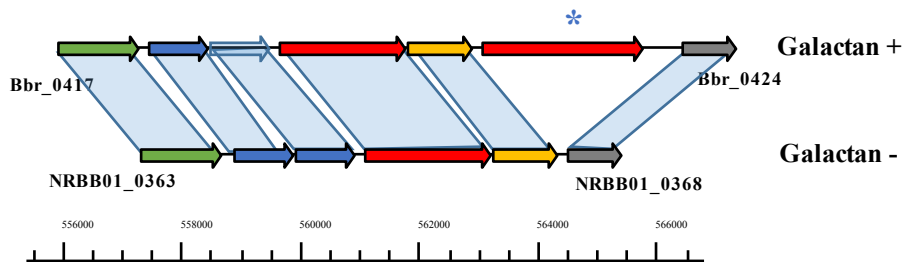

**Galactan utilization cluster**

Galactan +

Galactan -

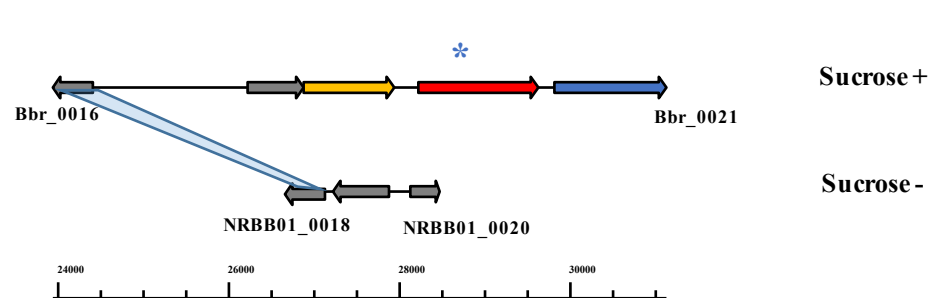

**Sucrose utilization cluster**

Sucrose +

Sucrose -

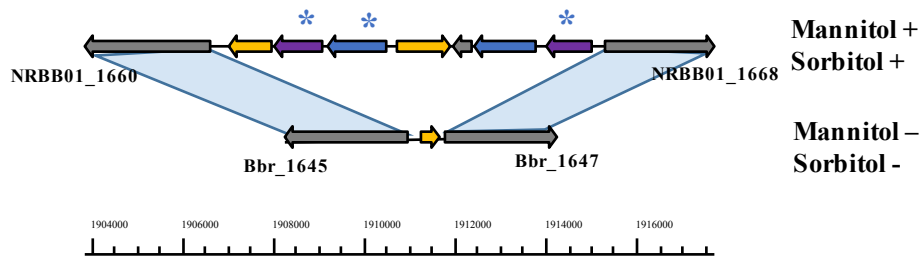

**Mannitol/Sorbitol utilization cluster**

Mannitol +  
Sorbitol +

Mannitol -  
Sorbitol -

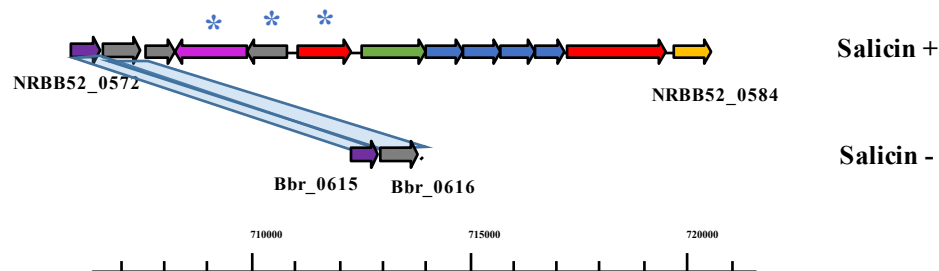

**Salicin utilization cluster**

FigureS1

Salicin +

Salicin -

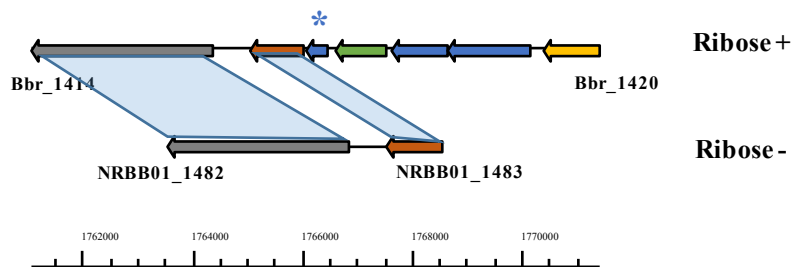

**Ribose utilization cluster**

Ribose +

Ribose -

**LEGEND**

- █ Glycosyl hydrolase
- █ Alcohol dehydrogenase
- █ Transcriptional regulator
- █ Solute binding protein

- █ Carbohydrate kinase
- █ Transporter permease
- █ Esterase
- █ Other
- \* GTM result

### Exopolysaccharide biosynthesis locus in *B. breve*

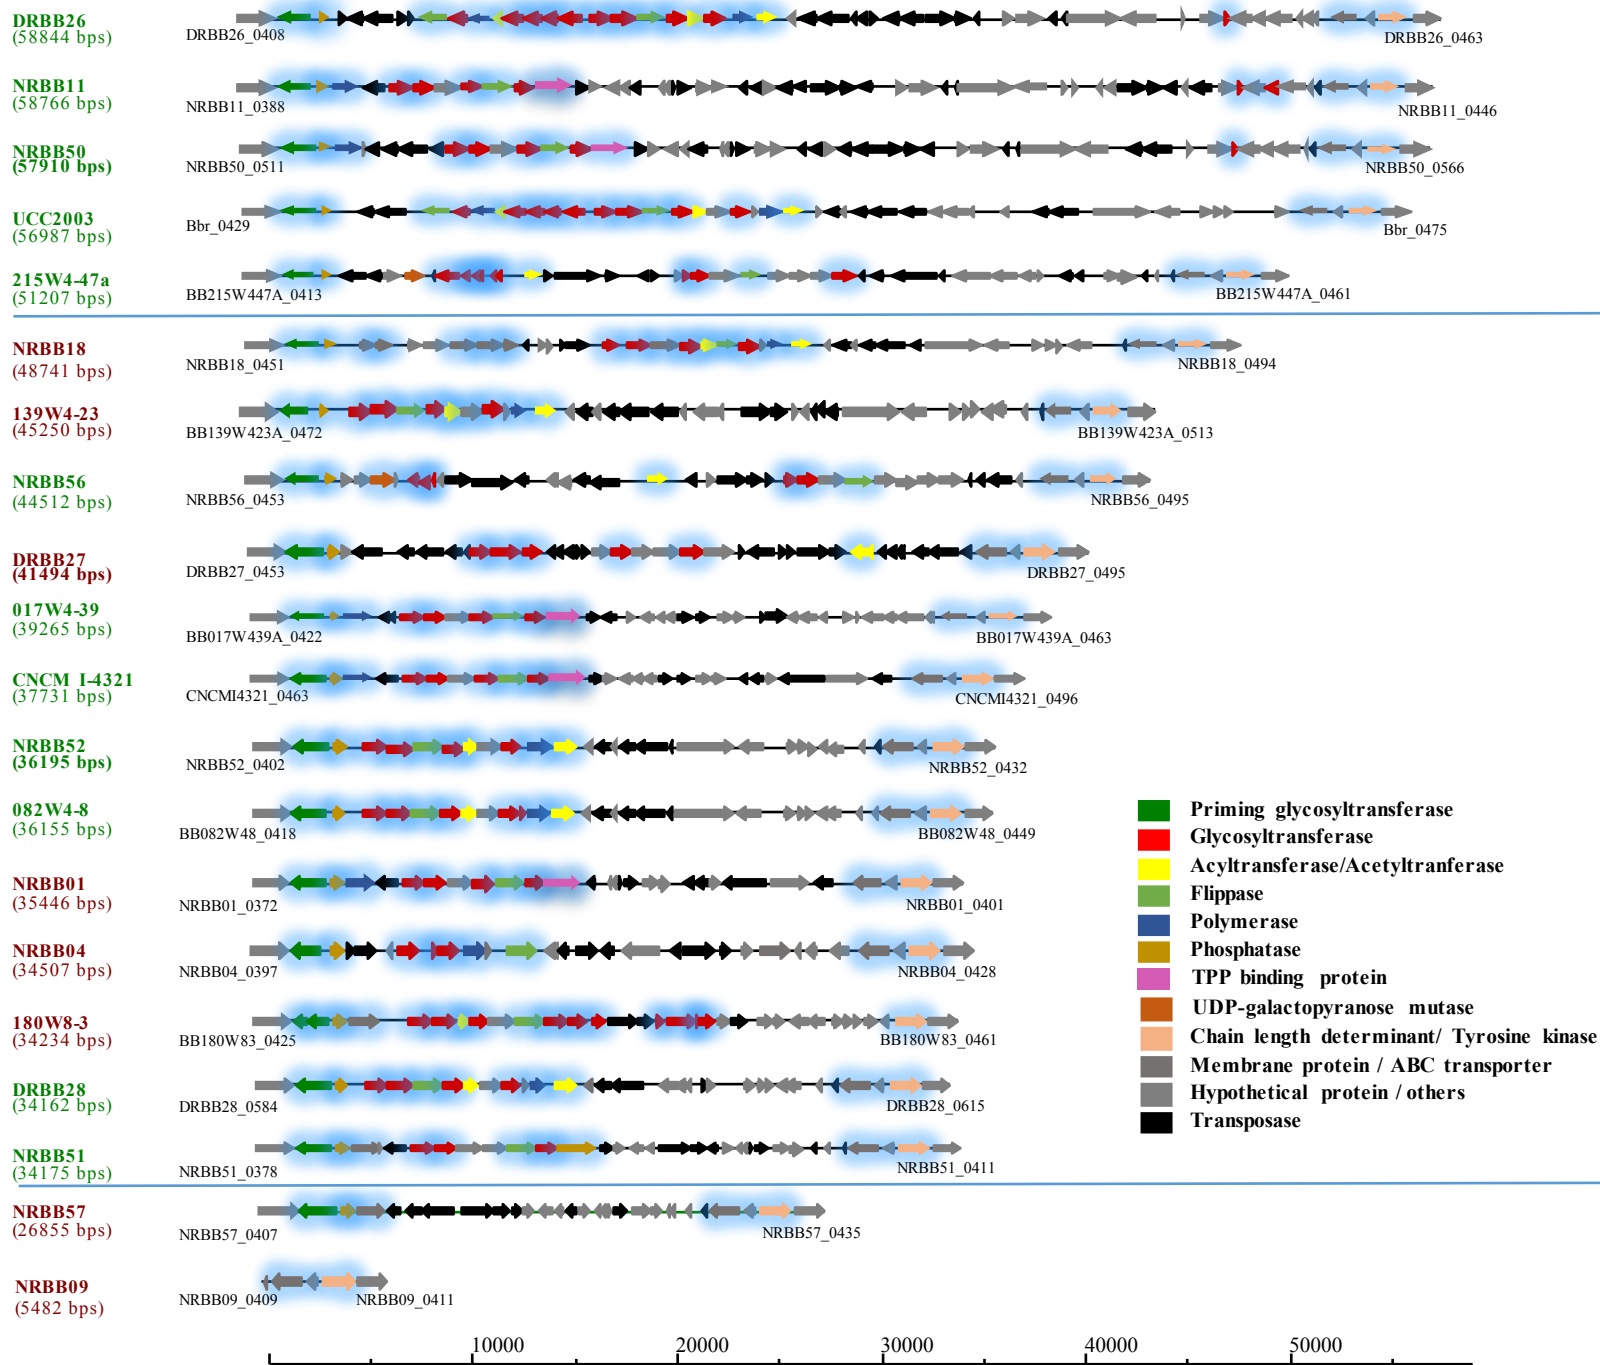

+  
EPS producers

+/-  
EPS producers  
and non-producers

-  
EPS non-producers
